# Supplementary material for: Rv0954 Is a Member of the Mycobacterial Cell Division Complex
Source: Front Microbiol. 2021 Apr 20;12:626461. doi: 10.3389/fmicb.2021.626461 (PMC8093794; doi:10.3389/fmicb.2021.626461)
Supplement: Supplementary file 2 [file Table_1.XLSX]

## Sheet: CoIP
Total Spectum Count (the zeros were replaced with '0.9' for ratio analysis)
Identified Proteins (1474)	Rv0060		Rv0954		Vector
Rv3411c_guaB2	554	577	866	580	943	673
Rv3003c_ilvB1	62	161	102	184	109	263
Rv0060_Rv0060	319	191	5	6	7	9
Rv0668_rpoC	127	121	57	65	28	71
Rv3859c_gltB	28	44	103	81	77	83
Rv1872c_lldD2	112	128	30	36	20	35
Rv0802c_Rv0802c	38	40	66	55	70	55
Rv1308_atpA	57	54	71	35	40	28
Rv3002c_ilvN	18	32	26	45	36	74
Rv3417c_groEL1	81	55	51	43	8	9
Rv1310_atpD	56	41	59	31	27	17
Rv0667_rpoB	54	60	26	30	9	33
Rv3270_ctpC	52	38	54	47	16	16
Rv2524c_fas	62	52	34	3	19	20
Rv1181_pks4	55	46	44	23	16	21
Rv3596c_clpC1	60	54	32	19	15	17
Rv3825c_pks2	53	41	29	17	14	16
Rv0284_eccC3	24	41	21	41	19	28
Rv2241_aceE	5	16	19	50	17	67
Rv3801c_fadD32	49	45	32	28	17	24
Rv0006_gyrA	56	57	13	18	10	23
Rv0440_groEL2	45	42	22	29	24	24
Rv3240c_secA1	55	56	7	29	7	24
Rv0207c_Rv0207c	14	23	26	40	16	46
Rv0655_mkl	41	47	19	9	14	7
Rv3646c_topA	53	54	4	24	1	20
Rv0685_tuf	48	40	17	14	12	18
Rv2101_helZ	61	49	12	12	5	13
Rv2159c_Rv2159c	39	45	17	21	10	19
Rv2482c_plsB2	54	53	11	11	3	13
Rv1783_eccC5	31	24	27	25	21	12
Rv2922c_smc	58	49	12	15	5	11
Rv2187_fadD15	48	44	21	14	9	9
Rv3858c_gltD	6	10	26	27	24	29
Rv1925_fadD31	37	32	20	16	16	18
Rv1479_moxR1	24	18	40	22	17	9
Rv0350_dnaK	46	30	20	9	14	14
Rv1751_Rv1751	35	35	20	15	10	10
Rv1630_rpsA	19	34	14	33	3	26
Rv0613c_Rv0613c	45	33	15	11	7	11
Rv2890c_rpsB	33	34	13	22	6	19
Rv0873_fadE10	33	27	35	15	8	7
Rv0248c_Rv0248c	22	17	32	22	14	8
Rv1161_narG	30	35	21	14	5	6
Rv1683_Rv1683	44	38	19	10	7	9
Rv0242c_fabG4	28	23	36	15	9	11
Rv1638_uvrA	43	52	2	11	3	11
Rv2839c_infB	37	37	9	16	3	15
Rv2048c_pks12	62	28	18	0.9	14	0.9
Rv1297_rho	40	32	11	12	10	16
Rv0724_sppA	16	21	25	23	10	30
Rv0270_fadD2	32	33	17	13	10	12
Rv0969_ctpV	27	30	22	31	0.9	2
Rv2783c_gpsI	36	29	16	19	4	18
Rv1309_atpG	22	20	27	19	16	15
Rv0147_Rv0147	36	33	5	13	2	15
Rv1175c_fadH	32	30	10	10	0.9	15
Rv0005_gyrB	42	34	7	6	5	9
Rv1191_Rv1191	27	30	21	18	4	6
Rv2195_qcrA	22	14	23	23	18	11
Rv1543_Rv1543	24	27	13	12	7	15
Rv3680_Rv3680	32	30	16	9	3	7
Rv3138_pflA	9	10	16	18	14	19
Rv3720_Rv3720	22	22	25	15	5	13
Rv2476c_gdh	40	34	8	0.9	12	4
Rv0860_fadB	4	46	2	20	0.9	25
Rv3721c_dnaZX	33	31	14	3	12	8
Rv3876_espI	34	38	8	8	3	9
Rv1771_Rv1771	18	15	25	16	5	10
Rv2221c_glnE	33	44	1	13	0.9	11
Rv2345_Rv2345	14	10	40	29	6	2
Rv2951c_Rv2951c	19	21	24	13	8	7
Rv3193c_Rv3193c	21	14	22	17	10	3
Rv3457c_rpoA	23	20	12	14	9	17
Rv3734c_tgs2	33	25	12	6	8	5
Rv2737c_recA	46	39	5	2	2	4
Rv3197_Rv3197	33	37	4	3	5	4
Rv0707_rpsC	28	26	9	9	3	15
Rv2457c_clpX	32	30	14	8	6	7
Rv2565_Rv2565	38	32	7	5	6	5
Rv3102c_ftsE	22	23	15	16	6	14
Rv3479_Rv3479	24	15	17	20	4	10
Rv3458c_rpsD	22	22	12	17	7	17
Rv2097c_pafA	32	28	14	9	8	5
Rv0647c_Rv0647c	35	27	8	7	7	6
Rv1488_Rv1488	18	14	28	18	7	4
Rv3917c_parB	28	30	3	12	5	9
Rv3692_moxR2	19	15	27	20	12	8
Rv0862c_Rv0862c	33	35	8	1	7	2
Rv1731_gabD2	17	25	24	10	8	6
Rv1423_whiA	25	23	8	11	2	15
Rv1223_htrA	10	6	33	31	8	2
Rv0511_hemD	19	27	4	11	3	15
Rv1206_fadD6	24	23	17	9	7	10
Rv2744c_35kd_ag	12	7	36	23	5	3
Rv1179c_Rv1179c	28	26	8	6	1	7
Rv0282_eccA3	28	32	6	0.9	7	10
Rv2289_cdh	13	16	15	14	11	10
Rv0824c_desA1	33	28	3	5	2	8
Rv1307_atpH	16	14	18	14	9	10
Rv0831c_Rv0831c	28	21	12	6	10	7
Rv1821_secA2	32	19	10	2	7	3
Rv3800c_pks13	26	22	12	3	6	7
Rv0001_dnaA	23	28	8	5	5	4
Rv2247_accD6	27	18	11	5	6	6
Rv2713_sthA	25	24	12	4	9	6
Rv2214c_ephD	17	21	18	10	2	4
Rv1880c_cyp140	26	26	7	3	1	4
Rv0501_galE2	27	24	13	8	0.9	3
Rv3296_lhr	31	28	0.9	1	0.9	0.9
Rv1020_mfd	33	31	1	3	4	1
Rv1133c_metE	18	25	4	3	7	21
Rv3130c_tgs1	6	31	2	18	0.9	12
Rv0934_pstS1	19	8	18	11	6	6
Rv0338c_Rv0338c	20	12	20	8	4	2
Rv0243_fadA2	13	9	17	10	6	6
Rv3213c_Rv3213c	22	22	9	9	5	7
Rv2153c_murG	22	26	9	9	4	7
Rv3206c_moeB1	27	19	14	4	7	5
Rv2374c_hrcA	24	22	7	3	6	6
Rv1798_eccA5	33	20	4	1	2	1
Rv3480c_Rv3480c	21	17	11	7	6	3
Rv0392c_ndhA	21	21	9	8	1	5
Rv0721_rpsE	14	20	6	12	4	15
Rv2583c_relA	33	21	2	3	3	4
Rv0683_rpsG	16	19	5	12	2	14
Rv0317c_glpQ2	18	18	7	7	4	6
Rv1480_Rv1480	13	11	15	12	2	2
Rv1173_fbiC	32	25	4	1	1	4
Rv2940c_mas	35	22	2	3	10	7
Rv0757_phoP	20	22	6	6	6	5
Rv2584c_apt	19	21	6	5	4	9
Rv1912c_fadB5	17	22	6	6	3	5
Rv3265c_wbbL1	19	18	13	14	1	2
Rv2483c_plsC	27	25	6	3	3	3
Rv2092c_helY	20	26	0.9	12	0.9	10
Rv2563_Rv2563	8	8	13	11	7	6
Rv3683_Rv3683	16	13	15	7	4	3
Rv1279_Rv1279	14	17	15	7	0.9	6
Rv0352_dnaJ1	21	21	4	6	3	3
Rv2721c_Rv2721c	12	7	15	14	8	4
Rv1780_Rv1780	26	20	8	3	4	2
Rv0701_rplC	12	14	9	11	5	10
Rv2296_Rv2296	15	14	16	8	7	6
Rv2298_Rv2298	15	13	7	7	3	10
Rv2953_Rv2953	17	17	11	7	3	2
Rv3519_Rv3519	17	18	12	7	3	2
Rv2962c_Rv2962c	22	17	7	3	2	2
Rv0931c_pknD	18	10	16	6	4	3
Rv2509_Rv2509	17	17	9	8	5	6
Serum albumin OS=Bos taurus GN=ALB PE=1 SV=4	15	20	4	7	4	8
Rv0524_hemL	25	17	11	1	1	3
Rv3910_Rv3910	20	13	15	9	4	0.9
Rv0255c_cobQ1	19	19	7	7	5	3
Rv2215_dlaT	3	12	6	10	4	15
Rv0530_Rv0530	14	16	10	5	3	4
Rv1701_Rv1701	23	24	3	7	2	3
Rv2590_fadD9	7	7	5	7	12	9
Rv0283_eccB3	4	12	7	16	4	10
Rv2703_sigA	20	17	2	4	2	9
Rv2343c_dnaG	26	22	1	4	1	1
Rv0247c_Rv0247c	11	10	17	7	4	4
Rv1708_Rv1708	17	16	9	8	5	5
Rv0220_lipC	24	18	11	3	1	1
Rv3610c_ftsH	7	3	20	14	10	0.9
Rv3868_eccA1	27	15	7	0.9	3	2
Rv1017c_prsA	4	16	0.9	18	0.9	18
Rv0410c_pknG	12	4	12	9	5	3
Rv3726_Rv3726	12	14	9	9	2	4
Rv0470c_pcaA	18	19	9	2	4	4
Rv1516c_Rv1516c	22	14	8	5	2	4
Rv1547_dnaE1	16	31	6	0.9	2	4
Rv2373c_dnaJ2	19	14	6	6	3	6
Rv3088_tgs4	11	14	2	8	0.9	7
Rv3059_cyp136	20	22	3	2	4	0.9
Rv1908c_katG	10	23	1	2	0.9	13
Rv0206c_mmpL3	5	5	12	15	9	5
Rv2444c_rne	20	12	10	7	5	5
Rv3205c_Rv3205c	18	13	9	5	7	6
Rv0702_rplD	11	11	7	12	2	13
Rv0982_mprB	4	3	23	18	0.9	0.9
Rv2461c_clpP1	25	15	6	3	6	2
Rv1248c_Rv1248c	25	27	1	0.9	0.9	2
Rv1544_Rv1544	14	16	9	8	3	6
Rv3038c_Rv3038c	18	13	8	4	6	3
Rv2047c_Rv2047c	13	21	9	1	1	2
Rv0136_cyp138	16	16	7	4	0.9	5
Rv0923c_Rv0923c	19	18	8	5	4	0.9
Rv2404c_lepA	26	23	1	2	0.9	3
Rv1992c_ctpG	7	10	15	13	0.9	1
Rv1278_Rv1278	27	24	1	0.9	1	0.9
Rv1294_thrA	20	16	7	4	2	3
Rv3842c_glpQ1	16	17	5	5	3	5
Rv2970c_lipN	15	11	13	6	1	3
Rv1265_Rv1265	18	17	8	10	1	1
Rv2285_Rv2285	27	21	4	0.9	0.9	0.9
Rv2969c_Rv2969c	12	10	11	6	3	3
Rv3460c_rpsM	12	11	5	10	3	12
Rv3151_nuoG	15	10	12	6	4	1
Rv0059_Rv0059	28	18	2	1	1	2
Rv3091_Rv3091	20	13	13	3	0.9	0.9
Rv0994_moeA1	17	18	5	2	5	4
Rv0719_rplF	11	11	4	10	2	6
Rv0641_rplA	11	11	5	11	2	12
Rv3679_Rv3679	17	13	9	4	3	2
Rv0825c_Rv0825c	12	10	14	8	2	2
Rv2928_tesA	23	16	2	0.9	2	2
Rv3084_lipR	20	23	6	4	1	0.9
Rv1194c_Rv1194c	15	16	2	5	1	7
Rv0809_purM	19	15	6	7	0.9	5
Rv2224c_caeA	10	4	22	10	2	0.9
Rv2030c_Rv2030c	2	29	0.9	11	0.9	10
Rv0631c_recC	19	29	1	2	0.9	0.9
Rv3080c_pknK	25	20	2	0.9	0.9	0.9
Rv0183_Rv0183	14	18	9	7	4	2
Rv0502_Rv0502	18	16	4	4	4	2
Rv0155_pntAa	11	5	17	7	6	2
Rv2051c_ppm1	15	11	6	4	2	1
Rv1426c_lipO	17	19	7	2	1	1
Rv3808c_glfT2	16	20	9	2	0.9	0.9
Rv0032_bioF2	23	23	0.9	2	0.9	0.9
Rv2564_glnQ	16	12	6	7	4	3
Rv0479c_Rv0479c	11	9	11	10	5	3
Rv3528c_Rv3528c	12	15	8	4	3	5
Rv1536_ileS	1	5	5	8	6	8
Rv0058_dnaB	29	18	0.9	0.9	1	0.9
Rv2952_Rv2952	12	13	6	7	6	5
Rv0859_fadA	13	19	2	5	2	7
Rv3273_Rv3273	10	7	11	9	9	2
Rv3232c_ppk2	10	14	2	7	2	8
Rv0704_rplB	8	10	3	11	0.9	14
Rv3254_Rv3254	12	21	5	4	2	0.9
Rv0106_Rv0106	0.9	38	0.9	3	0.9	7
Rv3729_Rv3729	19	16	6	2	3	1
Rv0509_hemA	15	18	5	3	2	1
Rv2488c_Rv2488c	5	7	7	1	2	14
Rv0088_Rv0088	11	12	8	7	2	7
Rv2242_Rv2242	16	18	8	0.9	2	0.9
Rv0630c_recB	16	24	0.9	0.9	0.9	1
Rv1770_Rv1770	10	11	12	6	3	4
Rv0818_Rv0818	12	13	7	4	2	6
Rv1611_trpC	17	10	3	2	7	4
Rv2888c_amiC	10	13	9	8	1	3
Rv3285_accA3	15	14	3	6	0.9	7
Rv3456c_rplQ	9	12	3	9	0.9	10
Rv2731_Rv2731	11	13	1	6	0.9	7
Rv2931_ppsA	29	0.9	14	0.9	0.9	1
Rv2200c_ctaC	7	6	9	10	10	5
Rv3584_lpqE	8	8	8	7	4	6
Rv0227c_Rv0227c	6	7	12	7	5	2
Rv3888c_Rv3888c	10	10	8	6	2	2
Rv1229c_mrp	12	15	5	2	2	2
Rv1747_Rv1747	11	9	8	10	2	2
Rv0014c_pknB	5	5	14	10	6	0.9
Rv2326c_Rv2326c	9	7	8	11	5	2
Rv0933_pstB	8	9	6	5	1	2
Rv0469_umaA	17	10	6	0.9	6	6
Rv2916c_ffh	16	17	1	3	0.9	7
Rv0568_cyp135B1	15	14	6	1	0.9	1
Rv3198c_uvrD2	16	11	4	1	10	1
Rv1963c_mce3R	13	15	0.9	4	0.9	7
Rv0383c_Rv0383c	6	7	10	9	7	4
Rv2284_lipM	11	5	12	5	3	3
Rv1232c_Rv1232c	19	13	3	4	2	4
Rv0428c_Rv0428c	14	10	5	3	6	1
Rv3775_lipE	12	10	9	2	2	1
Rv3693_Rv3693	3	3	15	14	2	0.9
Rv3241c_Rv3241c	11	10	7	6	3	5
Rv2129c_Rv2129c	8	8	13	7	2	2
Rv1446c_opcA	16	14	6	3	1	2
Rv2782c_pepR	17	12	3	1	1	1
Rv1769_Rv1769	7	10	9	7	1	10
Rv2305_Rv2305	10	12	10	4	0.9	1
Rv0107c_ctpI	16	19	5	0.9	0.9	0.9
Rv1218c_Rv1218c	12	12	6	6	5	3
Rv3676_crp	13	13	4	4	5	3
Rv3443c_rplM	7	12	7	7	1	10
Rv1078_pra	6	7	11	9	5	1
Rv1819c_bacA	6	2	12	7	5	1
Rv3139_fadE24	12	6	9	4	3	0.9
Rv0547c_Rv0547c	13	13	6	3	0.9	5
Rv1253_deaD	18	16	0.9	1	0.9	1
Rv2622_Rv2622	13	15	5	5	2	2
Rv1192_Rv1192	11	10	11	5	2	2
Rv1782_eccB5	8	4	8	7	6	1
Rv3248c_sahH	11	5	7	2	4	8
Rv2495c_bkdC	19	15	2	1	2	2
Rv0644c_mmaA2	19	6	8	1	6	5
Rv3701c_Rv3701c	17	13	4	0.9	3	1
Rv1593c_Rv1593c	7	12	1	11	0.9	12
Rv1852_ureG	13	8	10	4	0.9	0.9
Rv1915_aceAa	18	18	1	0.9	0.9	1
Rv1251c_Rv1251c	23	15	1	0.9	0.9	0.9
Rv2220_glnA1	14	9	3	1	3	6
Rv1266c_pknH	3	2	19	12	1	1
Rv2909c_rpsP	9	7	4	8	0.9	9
Rv3436c_glmS	12	10	10	4	0.9	0.9
Rv2582_ppiB	11	9	9	2	3	2
Rv0718_rpsH	7	12	4	5	3	7
Rv3264c_manB	14	10	7	3	2	3
Rv1392_metK	11	12	5	4	1	6
Rv0133_Rv0133	16	11	3	1	2	1
Rv2627c_Rv2627c	6	14	3	4	0.9	4
Rv1215c_Rv1215c	3	8	13	6	0.9	2
Rv3814c_Rv3814c	20	14	1	2	0.9	1
Rv2213_pepB	13	12	3	4	2	3
Rv0131c_fadE1	6	8	5	6	2	2
Rv3850_Rv3850	8	10	5	4	1	5
Rv3215_entC	15	13	6	2	3	0.9
Rv3915_Rv3915	10	11	4	0.9	2	1
Rv1697_Rv1697	12	8	7	5	1	0.9
Rv0821c_phoY2	16	17	4	1	0.9	0.9
Rv0412c_Rv0412c	6	6	9	8	2	4
Rv1919c_Rv1919c	7	8	10	6	4	3
Rv2131c_cysQ	13	8	7	2	2	2
Rv2921c_ftsY	8	8	7	5	2	3
Rv2196_qcrB	5	4	7	7	5	1
Rv1180_pks3	12	9	7	1	1	1
Rv0342_iniA	20	9	2	0.9	3	2
Rv2449c_Rv2449c	12	8	9	3	1	0.9
Rv1820_ilvG	14	12	5	2	1	0.9
Rv0015c_pknA	8	9	10	5	0.9	1
Rv3087_Rv3087	11	13	4	3	0.9	1
Rv1833c_Rv1833c	9	9	3	2	0.9	1
Rv0472c_Rv0472c	11	10	1	4	0.9	4
Rv3230c_Rv3230c	16	12	4	4	0.9	0.9
Rv3860_Rv3860	4	4	15	12	0.9	0.9
Rv2204c_Rv2204c	11	10	5	5	2	2
Rv1794_Rv1794	13	9	4	1	3	4
Rv3442c_rpsI	9	9	2	4	1	7
Rv0117_oxyS	11	11	5	1	2	2
Rv2150c_ftsZ	19	7	2	1	2	1
Rv3057c_Rv3057c	8	14	4	4	0.9	4
Rv3299c_atsB	8	5	21	2	2	0.9
Rv0983_pepD	8	5	12	8	1	0.9
Rv3269_Rv3269	11	8	10	6	0.9	0.9
Rv1865c_Rv1865c	17	13	2	2	0.9	0.9
Rv0938_ligD	15	12	0.9	1	0.9	2
Rv0949_uvrD1	19	15	2	0.9	0.9	0.9
Rv3311_Rv3311	6	5	6	8	5	3
Rv3256c_Rv3256c	11	9	4	5	3	2
Rv1836c_Rv1836c	6	4	10	7	3	2
Rv0072_Rv0072	6	3	12	10	3	2
Rv0696_Rv0696	5	12	7	5	1	3
Rv1641_infC	6	8	1	5	1	6
Rv3246c_mtrA	13	8	4	0.9	4	4
Rv3794_embA	4	4	11	10	3	0.9
Rv1095_phoH2	13	10	3	4	1	0.9
Rv2751_Rv2751	12	14	4	4	0.9	1
Rv3782_glfT1	10	9	5	3	0.9	0.9
Rv1013_pks16	13	14	4	0.9	2	0.9
Rv2559c_Rv2559c	16	14	1	0.9	1	0.9
Rv2850c_Rv2850c	13	15	2	0.9	1	0.9
Rv3667_acs	14	12	6	0.9	0.9	0.9
Rv2054_Rv2054	6	9	9	5	1	3
Rv1978_Rv1978	9	6	8	5	1	1
Rv1594_nadA	15	9	5	0.9	3	2
Rv2460c_clpP2	12	8	8	2	4	0.9
Rv3791_dprE2	10	9	6	4	3	0.9
Rv2245_kasA	10	11	1	1	0.9	2
Rv3225c_Rv3225c	16	14	1	0.9	3	0.9
Rv0292_eccE3	5	6	5	10	3	4
Rv0241c_htdX	7	9	3	5	2	4
Rv3041c_Rv3041c	12	15	2	3	1	2
Rv0651_rplJ	14	7	5	4	1	4
Rv0437c_psd	7	10	7	5	1	1
Rv1598c_Rv1598c	12	12	2	4	0.9	4
Rv1281c_oppD	13	7	5	6	1	0.9
Rv1666c_cyp139	16	13	1	2	0.9	2
Rv1621c_cydD	11	6	9	8	0.9	0.9
Rv3006_lppZ	4	1	16	6	0.9	0.9
Rv1409_ribG	11	14	5	0.9	0.9	1
Rv0347_Rv0347	4	4	7	2	7	2
Rv3140_fadE23	7	5	6	7	2	1
Rv1368_lprF	7	6	6	8	1	4
Rv0003_recF	12	10	1	3	1	2
Rv2904c_rplS	4	5	3	6	1	6
Rv3318_sdhA	5	2	11	7	3	0.9
Rv2091c_Rv2091c	5	4	14	9	2	0.9
Rv2363_amiA2	9	10	7	2	0.9	1
Rv0780_purC	15	11	1	0.9	3	1
Rv2426c_Rv2426c	15	9	3	0.9	0.9	0.9
Rv1795_eccD5	5	5	6	5	5	4
Rv0820_phoT	10	8	2	2	3	4
Rv1380_pyrB	7	10	6	3	2	4
Rv2442c_rplU	3	6	2	7	0.9	12
Rv0716_rplE	5	8	3	6	0.9	4
Rv1267c_embR	16	13	2	0.9	2	0.9
Rv2447c_folC	14	13	3	0.9	2	0.9
Rv1623c_cydA	6	4	5	3	2	3
Rv1311_atpC	4	3	7	4	3	1
Rv3487c_lipF	13	8	4	1	1	1
Rv0068_Rv0068	9	9	6	4	2	0.9
Rv3709c_ask	12	6	6	2	1	0.9
Rv0629c_recD	10	11	0.9	0.9	0.9	1
Rv1569_bioF1	13	12	3	2	1	0.9
Rv0785_Rv0785	12	10	0.9	5	0.9	3
Rv3644c_Rv3644c	14	16	2	0.9	0.9	1
Rv0732_secY	5	6	5	6	5	2
Rv2936_drrA	8	4	5	3	0.9	1
Rv3438_Rv3438	8	5	6	3	0.9	5
Rv0643c_mmaA3	13	5	3	0.9	4	2
Rv1703c_Rv1703c	10	12	2	0.9	1	6
Rv2158c_murE	14	14	1	0.9	0.9	0.9
Rv3663c_dppD	16	12	0.9	0.9	0.9	0.9
Rv1162_narH	4	5	6	5	2	3
Rv0445c_sigK	5	3	11	5	2	2
Rv0290_eccD3	1	5	3	13	4	5
Rv2299c_htpG	11	9	3	1	1	4
Rv2203_Rv2203	6	3	9	8	3	0.9
Rv0170_mce1B	5	5	7	4	4	0.9
Rv0496_Rv0496	10	8	0.9	2	2	3
Rv2496c_bkdB	14	8	1	1	1	0.9
Rv3909_Rv3909	7	2	6	8	1	0.9
Rv3682_ponA2	5	1	9	6	1	0.9
Rv3099c_Rv3099c	11	10	3	0.9	4	1
Rv3719_Rv3719	7	2	12	5	1	0.9
Rv1643_rplT	5	6	0.9	5	0.9	6
Rv1338_murI	14	5	7	0.9	4	0.9
Rv1391_dfp	6	9	0.9	5	0.9	8
Rv1420_uvrC	12	10	0.9	4	0.9	3
Rv0415_thiO	5	7	5	3	3	3
Rv0176_Rv0176	5	4	6	5	3	2
Rv3200c_Rv3200c	6	3	5	2	3	2
Rv3623_lpqG	6	6	9	2	3	2
Rv0444c_rskA	7	4	5	5	1	2
Rv0580c_Rv0580c	6	4	10	3	1	4
Rv3761c_fadE36	9	7	3	1	1	1
Rv0562_grcC1	12	5	5	1	4	1
Rv2824c_Rv2824c	8	9	1	4	0.9	2
Rv2734_Rv2734	11	11	2	2	0.9	2
Rv2715_Rv2715	7	5	10	3	1	0.9
Rv3302c_glpD2	8	3	12	2	0.9	0.9
Rv0558_menH	9	10	5	2	0.9	1
Rv2529_Rv2529	2	7	0.9	6	0.9	6
Rv1640c_lysX	3	3	10	7	0.9	0.9
Rv1238_sugC	11	4	6	6	0.9	0.9
Rv0221_Rv0221	8	10	4	2	0.9	0.9
Rv0939_Rv0939	12	14	1	0.9	1	0.9
Rv3616c_espA	6	6	5	3	3	2
Rv0464c_Rv0464c	7	5	5	6	2	2
Rv1443c_Rv1443c	7	5	6	4	2	1
Rv3869_eccB1	4	3	9	4	4	0.9
Rv1513_Rv1513	5	6	6	2	0.9	2
Rv1743_pknE	4	3	10	7	2	0.9
Rv3148_nuoD	12	1	5	6	2	0.9
Rv3212_Rv3212	2	1	8	4	1	0.9
Rv2691_ceoB	3	7	3	5	0.9	0.9
Rv2985_mutT1	6	9	0.9	4	0.9	4
Rv2967c_pca	12	6	3	0.9	3	0.9
Rv0139_Rv0139	9	4	3	2	0.9	0.9
Rv2182c_Rv2182c	10	8	5	1	0.9	0.9
Rv0276_Rv0276	12	12	2	1	0.9	0.9
Rv0337c_aspC	14	8	1	3	0.9	0.9
Rv3918c_parA	11	15	1	0.9	0.9	0.9
Rv2031c_hspX	5	4	1	10	3	3
Rv0902c_prrB	4	3	9	7	1	2
Rv1275_lprC	3	2	7	7	2	1
Rv0723_rplO	7	6	2	5	0.9	4
Rv0439c_Rv0439c	10	10	5	3	0.9	1
Rv3272_Rv3272	11	10	1	0.9	1	1
Rv0048c_Rv0048c	3	3	13	7	0.9	0.9
Rv0758_phoR	6	7	9	2	0.9	0.9
Rv3879c_espK	14	6	3	0.9	3	0.9
Rv2947c_pks15	16	9	2	0.9	0.9	2
Rv0134_ephF	11	7	1	1	0.9	0.9
Rv1270c_lprA	5	4	7	4	3	3
Rv1239c_corA	5	5	4	3	3	2
Rv3085_Rv3085	6	6	2	1	3	2
Rv1421_Rv1421	9	6	5	3	2	0.9
Rv3870_eccCa1	5	6	3	5	3	0.9
Rv2587c_secD	5	4	2	3	4	0.9
Rv0798c_cfp29	10	5	4	2	0.9	2
Rv0684_fusA1	9	5	3	0.9	1	3
Rv2405_Rv2405	6	8	8	1	0.9	2
Rv1927_Rv1927	10	9	3	2	0.9	1
Rv0570_nrdZ	9	6	0.9	3	0.9	4
Rv1711_Rv1711	8	6	0.9	5	0.9	4
Rv2739c_Rv2739c	11	5	5	1	0.9	0.9
Rv3866_espG1	11	4	0.9	0.9	2	0.9
Rv3292_Rv3292	13	7	1	0.9	1	0.9
Rv2397c_cysA1	13	11	0.9	0.9	0.9	2
Rv1629_polA	9	15	0.9	0.9	0.9	0.9
Rv3585_radA	13	11	0.9	0.9	0.9	0.9
Rv0180c_Rv0180c	5	2	3	5	6	4
Rv3390_lpqD	4	2	8	4	4	3
Rv2778c_Rv2778c	5	7	5	2	1	2
Rv3732_Rv3732	3	5	6	4	3	1
Rv2718c_nrdR	8	9	3	3	3	0.9
Rv0714_rplN	5	6	1	2	0.9	4
Rv1620c_cydC	2	3	7	5	0.9	1
Rv0646c_lipG	7	8	4	3	0.9	1
Rv0077c_Rv0077c	7	11	3	2	0.9	1
Rv2338c_moeW	6	7	4	3	0.9	1
Rv0036c_Rv0036c	7	9	1	0.9	1	1
Rv2913c_Rv2913c	11	7	2	1	0.9	1
Rv3077_Rv3077	11	9	2	1	0.9	1
Rv1402_priA	1	6	0.9	5	0.9	4
Rv3661_Rv3661	8	4	3	2	0.9	0.9
Rv3795_embB	4	0.9	10	6	2	0.9
Rv2042c_Rv2042c	11	10	1	2	0.9	0.9
Rv3116_moeB2	13	8	1	0.9	1	0.9
Rv0462_lpdC	12	8	0.9	0.9	1	3
Rv2282c_Rv2282c	12	8	2	1	0.9	0.9
Rv0357c_purA	0.9	9	0.9	2	0.9	3
Rv1050_Rv1050	14	7	3	0.9	0.9	0.9
Rv0184_Rv0184	9	10	0.9	0.9	0.9	2
Rv3001c_ilvC	7	8	2	2	2	3
Rv2219_Rv2219	6	3	6	4	2	3
Rv0157_pntB	1	4	8	5	3	2
Rv1829_Rv1829	4	5	4	2	4	3
Rv2673_aftC	4	4	6	1	1	2
Rv3090_Rv3090	4	3	7	2	4	1
Rv0054_ssb	5	7	1	3	1	5
Rv2102_Rv2102	9	8	1	2	1	2
Rv0981_mprA	8	9	2	1	1	2
Rv1614_lgt	5	5	6	3	3	0.9
Rv0708_rplP	6	6	4	0.9	2	5
Rv2073c_Rv2073c	5	7	3	3	0.9	2
Rv0871_cspB	5	5	1	6	0.9	6
Rv1106c_Rv1106c	6	7	5	3	0.9	1
Rv1397c_vapC10	5	4	1	2	0.9	5
Rv3418c_groES	6	10	1	1	0.9	5
Rv1003_Rv1003	4	7	0.9	5	0.9	5
Rv2184c_Rv2184c	13	7	1	0.9	1	0.9
Rv3301c_phoY1	15	8	4	0.9	1	0.9
Rv0418_lpqL	6	1	8	1	3	0.9
Rv1736c_narX	1	14	0.9	6	0.9	1
Rv1592c_Rv1592c	8	8	2	0.9	0.9	1
Rv2391_sirA	11	8	0.9	0.9	0.9	3
Rv2062c_cobN	14	6	0.9	0.9	0.9	0.9
Rv0475_hbhA	4	7	3	3	2	2
Rv3319_sdhB	3	3	3	3	2	1
Rv2869c_rip	5	3	9	3	2	0.9
Rv3194c_Rv3194c	4	2	5	4	1	0.9
Rv1920_Rv1920	6	10	1	1	0.9	1
Rv1481_Rv1481	2	1	9	7	4	0.9
Rv2849c_cobO	7	13	1	1	0.9	2
Rv0958_Rv0958	9	6	2	1	1	0.9
Rv0710_rpsQ	8	8	1	1	1	3
Rv3674c_nth	4	8	0.9	3	0.9	3
Rv3554_fdxB	8	5	6	3	0.9	0.9
Rv0148_Rv0148	6	6	2	0.9	0.9	2
Rv1330c_pncB1	8	6	3	6	0.9	0.9
Rv3774_echA21	7	5	1	0.9	0.9	6
Rv1429_Rv1429	8	6	2	0.9	1	0.9
Rv1658_argG	11	7	0.9	0.9	2	1
Rv3164c_moxR3	9	9	1	0.9	0.9	0.9
Rv1586c_Rv1586c	7	6	0.9	0.9	0.9	3
Rv3685c_cyp137	10	11	3	0.9	0.9	0.9
Rv3051c_nrdE	8	10	1	0.9	0.9	0.9
Rv0343_iniC	12	10	0.9	0.9	0.9	0.9
Rv2463_lipP	13	10	0.9	0.9	0.9	0.9
Rv2986c_hupB	4	5	1	5	2	3
Rv1006_Rv1006	2	1	7	3	1	1
Rv3478_PPE60	8	8	1	1	1	1
Rv2785c_rpsO	4	5	5	4	0.9	3
Rv0171_mce1C	5	2	7	2	3	0.9
Rv2068c_blaC	6	4	4	2	1	0.9
Rv1306_atpF	4	4	7	1	0.9	4
Rv0896_gltA2	6	8	1	0.9	1	4
Rv2955c_Rv2955c	6	6	3	1	0.9	1
Rv2945c_lppX	5	2	12	2	0.9	0.9
Rv2989_Rv2989	5	8	0.9	5	0.9	2
Rv0823c_Rv0823c	6	9	0.9	2	0.9	1
Rv1015c_rplY	2	6	0.9	7	0.9	4
Rv0178_Rv0178	8	6	1	1	0.9	0.9
Rv3843c_Rv3843c	3	0.9	9	4	0.9	0.9
Rv2990c_Rv2990c	0.9	10	0.9	3	0.9	3
Rv2244_acpM	6	5	2	3	2	3
Rv1871c_Rv1871c	2	5	3	5	1	4
Rv2586c_secF	4	4	4	3	4	1
Rv2161c_Rv2161c	6	7	2	2	1	2
Rv3691_Rv3691	2	2	6	7	2	0.9
Rv1797_eccE5	3	1	3	3	3	0.9
Rv2868c_gcpE	7	6	2	0.9	3	3
Rv0173_lprK	6	5	2	1	4	0.9
Rv3132c_devS	5	8	1	2	0.9	2
Rv3218_Rv3218	3	4	4	3	0.9	1
Rv2252_Rv2252	6	5	4	4	0.9	0.9
Rv1436_gap	6	5	2	0.9	0.9	5
Rv3083_Rv3083	7	6	6	0.9	2	0.9
Rv2682c_dxs1	8	3	7	1	1	0.9
Rv1473_Rv1473	10	5	1	0.9	2	0.9
Rv1689_tyrS	0.9	7	0.9	3	0.9	5
Rv2194_qcrC	4	3	3	3	3	2
Rv2151c_ftsQ	4	3	5	3	1	2
Rv0686_Rv0686	4	2	4	6	1	1
Rv0237_lpqI	3	1	6	4	2	1
Rv0642c_mmaA4	9	5	2	0.9	2	2
Rv2981c_ddlA	9	5	2	0.9	2	1
Rv3627c_Rv3627c	5	1	7	5	3	0.9
Rv0966c_Rv0966c	8	7	1	1	0.9	1
Rv0384c_clpB	8	8	3	1	2	4
Rv3816c_Rv3816c	6	5	6	3	0.9	0.9
Rv0705_rpsS	7	7	0.9	2	0.9	4
Rv2766c_Rv2766c	2	8	0.9	4	0.9	6
Rv0481c_Rv0481c	6	10	0.9	0.9	2	2
Rv1280c_oppA	1	0.9	6	5	2	0.9
Rv2903c_lepB	4	1	10	3	0.9	0.9
Rv2794c_pptT	9	7	2	1	0.9	0.9
Rv0669c_Rv0669c	4	3	5	1	0.9	1
Rv0312_Rv0312	10	4	4	0.9	1	0.9
Rv3626c_Rv3626c	5	2	7	0.9	0.9	0.9
Rv1063c_Rv1063c	9	6	2	0.9	0.9	0.9
Rv3329_Rv3329	9	7	2	0.9	0.9	0.9
Rv2954c_Rv2954c	11	8	0.9	0.9	0.9	1
Rv2484c_Rv2484c	11	7	0.9	0.9	0.9	0.9
Rv3190c_Rv3190c	9	10	0.9	0.9	0.9	0.9
Rv2752c_Rv2752c	3	5	3	4	0.9	3
Rv2996c_serA1	3	4	4	0.9	3	3
Rv2581c_Rv2581c	6	6	3	2	1	0.9
Rv3758c_proV	3	3	3	0.9	1	0.9
Rv3871_eccCb1	9	4	3	1	1	0.9
Rv2842c_Rv2842c	5	5	0.9	4	0.9	4
Rv3920c_Rv3920c	7	5	0.9	6	0.9	3
Rv2553c_Rv2553c	6	5	2	5	0.9	0.9
Rv1713_engA	3	8	0.9	2	0.9	7
Rv1981c_nrdF1	10	6	2	0.9	0.9	2
Rv2609c_Rv2609c	1	0.9	8	6	2	0.9
Rv3211_rhlE	8	5	1	0.9	0.9	3
Rv2743c_Rv2743c	7	2	7	1	0.9	0.9
Rv1523_Rv1523	8	10	0.9	0.9	1	0.9
Rv0959_Rv0959	11	10	3	3	3	1
Rv2258c_Rv2258c	9	9	1	0.9	0.9	0.9
Rv3587c_Rv3587c	5	3	4	3	1	2
Rv2061c_Rv2061c	3	4	3	4	1	2
Rv3043c_ctaD	4	1	2	4	2	2
Rv3633_Rv3633	6	4	2	1	2	0.9
Rv0055_rpsR1	4	6	1	2	0.9	3
Rv2118c_Rv2118c	3	4	0.9	3	0.9	3
Rv1868_Rv1868	4	7	0.9	2	0.9	3
Rv2088_pknJ	4	2	5	1	0.9	0.9
Rv3645_Rv3645	5	3	4	1	0.9	0.9
Rv1595_nadB	7	4	2	0.9	4	0.9
Rv3907c_pcnA	3	9	0.9	1	0.9	2
Rv1204c_Rv1204c	8	6	1	0.9	1	0.9
Rv1286_cysN	6	10	1	0.9	0.9	1
Rv2178c_aroG	9	7	1	1	0.9	0.9
Rv0046c_ino1	11	3	1	0.9	0.9	1
Rv3377c_Rv3377c	4	6	2	0.9	0.9	0.9
Rv1124_ephC	5	6	3	0.9	0.9	0.9
Rv1509_Rv1509	3	11	2	0.9	0.9	0.9
Rv3208_Rv3208	8	8	1	0.9	0.9	0.9
Rv0404_fadD30	10	7	1	0.9	0.9	0.9
Rv1317c_alkA	9	7	0.9	0.9	0.9	1
Rv2956_Rv2956	8	9	2	2	0.9	1
Rv2820c_Rv2820c	9	7	1	0.9	0.9	0.9
Rv0386_Rv0386	10	8	0.9	0.9	0.9	0.9
Rv0561c_Rv0561c	9	9	0.9	0.9	0.9	0.9
Rv0890c_Rv0890c	12	4	0.9	0.9	0.9	0.9
Rv1508c_Rv1508c	2	1	4	5	2	1
Rv0706_rplV	5	4	2	2	0.9	4
Rv3058c_Rv3058c	3	6	1	3	0.9	3
Rv0092_ctpA	4	3	4	2	1	0.9
Rv0189c_ilvD	4	6	5	0.9	1	1
Rv1882c_Rv1882c	4	6	3	2	0.9	1
Rv0932c_pstS2	4	1	5	2	1	0.9
Rv1458c_Rv1458c	4	4	6	2	0.9	0.9
Rv1540_Rv1540	2	3	0.9	3	0.9	5
Rv1092c_coaA	2	5	0.9	3	0.9	4
Rv3459c_rpsK	6	6	0.9	2	0.9	2
Rv3894c_eccC2	7	2	2	3	0.9	0.9
Rv2226_Rv2226	1	5	0.9	5	0.9	3
Rv3908_mutT4	9	7	0.9	1	0.9	1
Rv0073_Rv0073	4	8	1	3	0.9	1
Rv3303c_lpdA	7	7	0.9	2	1	0.9
Rv0806c_cpsY	5	5	0.9	1	0.9	2
Rv1428c_Rv1428c	8	3	3	1	0.9	0.9
Rv0070c_glyA2	8	2	3	0.9	0.9	1
Rv0182c_sigG	9	3	2	0.9	0.9	0.9
Rv2528c_mrr	0.9	8	0.9	5	0.9	3
Rv2002_fabG3	8	8	2	0.9	0.9	0.9
Rv2852c_mqo	7	7	2	0.9	0.9	0.9
Rv0761c_adhB	6	8	0.9	0.9	0.9	1
Rv0652_rplL	10	6	2	0.9	0.9	0.9
Rv1515c_Rv1515c	8	6	1	0.9	0.9	0.9
Rv1138c_Rv1138c	10	6	0.9	0.9	0.9	0.9
Rv1662_pks8	8	6	0.9	0.9	0.9	0.9
Rv0632c_echA3	2	1	4	1	3	2
Rv1923_lipD	4	2	5	2	2	0.9
Rv3093c_Rv3093c	5	5	2	1	0.9	2
Rv3150_nuoF	5	3	4	1	0.9	2
Rv1094_desA2	4	6	1	0.9	2	3
Rv3490_otsA	5	4	2	1	0.9	3
Rv0635_hadA	6	3	4	2	0.9	1
Rv2392_cysH	5	7	3	0.9	1	1
Rv0291_mycP3	1	1	4	6	0.9	4
Rv1118c_Rv1118c	5	4	3	2	0.9	1
Rv1093_glyA1	7	5	1	1	0.9	2
Rv3042c_serB2	5	5	1	0.9	3	2
Rv2045c_lipT	7	4	2	1	0.9	1
Rv0249c_Rv0249c	4	1	4	3	0.9	0.9
Rv1320c_Rv1320c	3	3	4	3	0.9	0.9
Rv3796_Rv3796	5	3	5	2	0.9	0.9
Rv3050c_Rv3050c	3	6	0.9	2	0.9	6
Rv0262c_aac	5	3	2	3	0.9	0.9
Rv2984_ppk1	2	4	0.9	2	0.9	7
Rv2074_Rv2074	3	5	0.9	3	0.9	5
Rv2286c_Rv2286c	9	2	1	0.9	2	0.9
Rv0202c_mmpL11	5	1	5	4	0.9	0.9
Rv3034c_Rv3034c	3	4	7	1	0.9	0.9
Rv2535c_pepQ	4	9	1	0.9	1	0.9
Rv3793_embC	0.9	1	4	6	2	0.9
Rv2027c_dosT	9	4	1	0.9	1	0.9
Rv2683_Rv2683	3	3	1	2	2	2
Rv2670c_Rv2670c	6	7	2	0.9	1	0.9
Rv1234_Rv1234	1	1	7	5	0.9	0.9
Rv2567_Rv2567	9	3	0.9	0.9	3	1
Rv2173_idsA2	8	4	1	0.9	0.9	0.9
Rv2884_Rv2884	10	4	1	1	0.9	0.9
Rv0166_fadD5	7	5	0.9	0.9	2	0.9
Rv2500c_fadE19	10	4	2	0.9	0.9	0.9
Rv1514c_Rv1514c	6	4	1	0.9	0.9	0.9
Rv3711c_dnaQ	8	8	0.9	1	0.9	0.9
Rv0029_Rv0029	9	4	1	0.9	1	0.9
Rv1407_fmu	11	4	0.9	0.9	0.9	0.9
Rv2592c_ruvB	10	3	0.9	0.9	0.9	0.9
Rv2115c_mpa	3	3	1	3	2	2
Rv3044_fecB	4	1	6	2	2	1
Rv3695_Rv3695	1	1	5	4	1	0.9
Rv0526_Rv0526	1	0.9	5	4	2	1
Rv0715_rplX	3	5	0.9	3	0.9	3
Rv1188_Rv1188	2	6	3	4	0.9	0.9
Rv3131_Rv3131	2	8	0.9	2	0.9	3
Rv2155c_murD	7	4	2	0.9	2	0.9
Rv0018c_pstP	2	0.9	7	4	2	0.9
Rv2748c_ftsK	4	3	4	1	0.9	0.9
Rv2439c_proB	1	7	0.9	3	0.9	2
Rv3158_nuoN	1	0.9	3	1	1	0.9
Rv0056_rplI	1	8	0.9	2	0.9	2
Rv3609c_folE	5	6	1	1	0.9	0.9
Rv1812c_Rv1812c	9	0.9	2	0.9	2	1
Rv1617_pykA	8	4	1	0.9	0.9	1
Rv2351c_plcA	6	4	3	0.9	2	0.9
Rv1842c_Rv1842c	7	3	1	3	0.9	0.9
Rv2793c_truB	3	2	0.9	0.9	0.9	1
Rv1854c_ndh	9	5	2	1	0.9	1
Rv2516c_Rv2516c	7	7	0.9	0.9	0.9	2
Rv0914c_Rv0914c	7	4	2	0.9	0.9	0.9
Rv0567_Rv0567	7	4	0.9	0.9	2	0.9
Rv1589_bioB	8	4	1	0.9	0.9	0.9
Rv2672_Rv2672	0.9	0.9	5	6	0.9	0.9
Rv0734_mapA	6	10	0.9	0.9	0.9	0.9
Rv2228c_Rv2228c	8	6	0.9	0.9	0.9	0.9
Rv2756c_hsdM	11	5	0.9	0.9	0.9	0.9
Rv2894c_xerC	6	10	0.9	0.9	0.9	0.9
Rv3075c_Rv3075c	7	7	0.9	0.9	0.9	0.9
Rv3266c_rmlD	9	6	0.9	0.9	0.9	0.9
Rv2933_ppsC	11	0.9	2	0.9	0.9	0.9
Rv1261c_Rv1261c	2	1	5	2	1	1
Rv0144_Rv0144	5	5	1	1	1	2
Rv1422_Rv1422	4	3	4	1	1	0.9
Rv0564c_gpdA1	1	3	1	4	3	0.9
Rv0993_galU	2	5	2	2	1	1
Rv1500_Rv1500	3	4	3	3	1	0.9
Rv0177_Rv0177	2	2	5	2	0.9	0.9
Rv1691_Rv1691	4	3	0.9	2	0.9	1
Rv1328_glgP	3	0.9	5	0.9	1	2
Rv3704c_gshA	7	2	2	0.9	1	0.9
Rv2041c_Rv2041c	4	1	4	4	0.9	0.9
Rv1388_mihF	0.9	4	0.9	3	0.9	4
Rv1486c_Rv1486c	7	5	3	0.9	0.9	0.9
Rv3854c_ethA	3	8	4	0.9	0.9	0.9
Rv2280_Rv2280	4	7	1	0.9	0.9	0.9
Rv0174_mce1F	7	0.9	3	1	0.9	0.9
Rv0127_mak	8	5	1	0.9	0.9	0.9
Rv0217c_lipW	7	5	1	0.9	0.9	0.9
Rv1475c_acn	0.9	6	1	0.9	0.9	2
Rv2485c_lipQ	5	6	1	0.9	0.9	0.9
Rv0118c_oxcA	10	4	0.9	1	0.9	0.9
Rv0885_Rv0885	5	6	1	0.9	0.9	0.9
Rv2082_Rv2082	9	4	1	0.9	0.9	0.9
Rv0869c_moaA2	6	6	0.9	0.9	0.9	0.9
Rv0639_nusG	6	3	0.9	0.9	0.9	0.9
Rv3024c_trmU	10	4	0.9	0.9	0.9	0.9
Rv3391_acrA1	4	7	0.9	0.9	0.9	0.9
Rv1483_fabG1	3	2	1	2	2	2
Rv2623_TB31.7	3	4	1	1	2	1
Rv2263_Rv2263	2	5	3	1	0.9	2
Rv0169_mce1A	2	2	2	2	3	0.9
Rv2005c_Rv2005c	3	3	2	4	0.9	1
Rv1411c_lprG	3	2	3	1	2	1
Rv0941c_Rv0941c	2	2	1	2	0.9	2
Rv2802c_Rv2802c	4	2	0.9	4	0.9	2
Rv2198c_mmpS3	2	3	4	5	0.9	0.9
Rv0172_mce1D	2	4	5	0.9	3	0.9
Rv1010_ksgA	4	3	0.9	2	0.9	2
Rv1235_lpqY	2	1	7	1	0.9	0.9
Rv1178_Rv1178	4	3	3	0.9	1	0.9
Rv3510c_Rv3510c	4	4	0.9	1	0.9	3
Rv0016c_pbpA	2	0.9	4	3	1	0.9
Rv0703_rplW	3	4	0.9	1	0.9	4
Rv1304_atpB	2	2	6	2	0.9	0.9
Rv0419_lpqM	6	1	4	1	0.9	0.9
Rv3220c_Rv3220c	8	3	1	0.9	1	0.9
Rv1455_Rv1455	1	1	4	1	0.9	0.9
Rv3076_Rv3076	0.9	2	1	1	0.9	2
Rv2394_ggtB	2	0.9	8	2	0.9	0.9
Rv0432_sodC	3	0.9	4	3	0.9	0.9
Rv2941_fadD28	7	6	0.9	0.9	0.9	3
Rv0043c_Rv0043c	6	4	0.9	0.9	0.9	1
Rv0778_cyp126	7	3	2	0.9	0.9	0.9
Rv0165c_mce1R	5	7	1	0.9	0.9	0.9
Rv0295c_Rv0295c	8	4	0.9	0.9	0.9	1
Rv3670_ephE	3	8	1	0.9	0.9	0.9
Rv0485_Rv0485	7	6	0.9	0.9	0.9	0.9
Rv1186c_Rv1186c	6	4	0.9	0.9	0.9	0.9
Rv1447c_zwf2	7	5	0.9	0.9	0.9	0.9
Rv3202c_Rv3202c	11	3	0.9	0.9	0.9	0.9
Rv2425c_Rv2425c	11	3	0.9	0.9	0.9	0.9
Rv1245c_Rv1245c	4	2	3	3	3	3
Rv1023_eno	2	1	2	1	3	2
Rv0346c_ansP2	2	1	4	1	2	2
Rv0019c_fhaB	1	2	4	3	3	0.9
Rv3669_Rv3669	4	2	1	1	0.9	1
Rv3606c_folK	5	3	1	0.9	1	1
Rv1489_Rv1489	0.9	1	2	2	1	2
Rv3547_ddn	2	3	3	1	0.9	1
Rv2689c_Rv2689c	3	2	0.9	2	0.9	3
Rv2413c_Rv2413c	6	3	2	1	0.9	0.9
Rv1636_TB15.3	2	5	2	0.9	0.9	2
Rv3049c_Rv3049c	4	3	2	1	0.9	0.9
Rv3401_Rv3401	4	4	2	0.9	1	0.9
Rv3173c_Rv3173c	3	2	0.9	2	0.9	1
Rv2300c_Rv2300c	5	6	1	1	0.9	0.9
Rv0293c_Rv0293c	2	2	5	1	0.9	0.9
Rv3127_Rv3127	0.9	6	0.9	3	0.9	3
Rv0505c_serB1	5	3	2	0.9	0.9	0.9
Rv0986_Rv0986	7	4	2	0.9	0.9	0.9
Rv1393c_Rv1393c	2	6	3	0.9	0.9	0.9
Rv1568_bioA	0.9	0.9	3	2	4	0.9
Rv3602c_panC	4	5	0.9	0.9	1	0.9
Rv1652_argC	9	4	1	0.9	0.9	0.9
Rv2368c_phoH1	4	6	0.9	1	0.9	0.9
Rv0940c_Rv0940c	0.9	7	0.9	1	0.9	2
Rv3778c_Rv3778c	5	5	1	0.9	0.9	0.9
Rv1008_tatD	5	7	1	0.9	0.9	0.9
Rv3328c_sigJ	8	4	0.9	1	0.9	0.9
Rv3765c_tcrX	8	3	0.9	0.9	1	0.9
Rv3582c_ispD	8	4	1	0.9	0.9	0.9
Rv3703c_Rv3703c	5	6	1	0.9	0.9	0.9
Rv0344c_lpqJ	0.9	0.9	7	2	0.9	0.9
Rv2467_pepN	9	1	0.9	0.9	0.9	0.9
Rv0045c_Rv0045c	7	5	0.9	0.9	0.9	0.9
Rv0050_ponA1	3	0.9	8	0.9	0.9	0.9
Rv0365c_Rv0365c	4	7	0.9	0.9	0.9	0.9
Rv1289_Rv1289	5	7	0.9	0.9	0.9	0.9
Rv1425_Rv1425	6	5	0.9	0.9	0.9	0.9
Rv1427c_fadD12	7	5	0.9	0.9	0.9	0.9
Rv1498c_Rv1498c	7	6	0.9	0.9	0.9	0.9
Rv1618_tesB1	7	3	0.9	0.9	0.9	0.9
Rv2016_Rv2016	7	6	0.9	0.9	0.9	0.9
Rv2823c_Rv2823c	6	5	0.9	0.9	0.9	0.9
Rv3086_adhD	6	6	0.9	0.9	0.9	0.9
Rv3586_Rv3586	7	5	0.9	0.9	0.9	0.9
Rv3714c_Rv3714c	7	6	0.9	0.9	0.9	0.9
Rv3234c_tgs3	4	5	0.9	0.9	0.9	0.9
Rv3201c_Rv3201c	9	2	0.9	0.9	0.9	0.9
Rv1461_Rv1461	10	2	0.9	0.9	0.9	0.9
Rv2403c_lppR	0.9	0.9	9	2	0.9	0.9
Rv2934_ppsD	0.9	0.9	9	0.9	0.9	0.9
Rv3498c_mce4B	2	2	1	3	1	1
Rv3802c_Rv3802c	2	2	2	2	1	1
Rv2468c_Rv2468c	4	2	1	1	1	1
Rv3146_nuoB	2	2	2	1	2	0.9
Rv0013_trpG	2	4	2	0.9	1	1
Rv3805c_aftB	3	2	3	2	1	0.9
Rv3895c_eccB2	1	1	4	1	2	0.9
Rv3028c_fixB	1	5	0.9	1	1	3
Rv0153c_ptbB	4	2	1	0.9	1	1
Rv0700_rpsJ	4	4	1	1	0.9	2
Rv0307c_Rv0307c	2	3	1	1	1	0.9
Rv0687_Rv0687	2	3	1	1	0.9	1
Rv2113_Rv2113	2	2	3	3	0.9	0.9
Rv1576c_Rv1576c	5	3	2	0.9	2	0.9
Rv0364_Rv0364	2	3	3	2	0.9	0.9
Rv0968_Rv0968	3	5	1	3	0.9	0.9
Rv0906_Rv0906	4	3	5	1	0.9	0.9
Rv3384c_vapC46	3	5	0.9	1	0.9	2
Rv1097c_Rv1097c	1	1	5	4	0.9	0.9
Rv0038_Rv0038	6	2	2	0.9	1	0.9
Rv0164_TB18.5	4	2	1	0.9	1	1
Rv1762c_Rv1762c	5	1	2	1	0.9	0.9
Rv2902c_rnhB	4	4	1	0.9	1	0.9
Rv1125_Rv1125	4	3	2	1	0.9	0.9
Rv2454c_Rv2454c	6	4	1	0.9	0.9	1
Rv2610c_pimA	4	3	0.9	1	0.9	1
Rv2957_Rv2957	2	4	2	0.9	0.9	0.9
Rv2237_Rv2237	6	4	2	0.9	0.9	0.9
Rv3575c_Rv3575c	5	4	0.9	0.9	0.9	2
Rv0781_ptrBa	5	2	2	0.9	0.9	0.9
Rv0425c_ctpH	2	5	2	0.9	0.9	0.9
Rv1321_Rv1321	5	2	0.9	0.9	1	0.9
Rv3037c_Rv3037c	6	4	0.9	0.9	0.9	1
Rv0954_Rv0954	0.9	1	6	3	0.9	1
Rv0903c_prrA	6	4	1	0.9	1	0.9
Rv1387_PPE20	6	5	0.9	0.9	0.9	1
Rv0434_Rv0434	6	4	0.9	0.9	1	0.9
Rv0053_rpsF	5	5	0.9	0.9	0.9	1
Rv2246_kasB	6	4	1	0.9	0.9	0.9
Rv0681_Rv0681	6	4	0.9	0.9	0.9	0.9
Rv0861c_ercc3	4	8	0.9	0.9	0.9	0.9
Rv1333_Rv1333	7	4	0.9	0.9	0.9	0.9
Rv1442_bisC	7	4	0.9	0.9	0.9	0.9
Rv1526c_Rv1526c	5	6	0.9	0.9	0.9	0.9
Rv1901_cinA	6	5	0.9	0.9	0.9	0.9
Rv2110c_prcB	5	6	0.9	0.9	0.9	0.9
Rv3263_Rv3263	7	5	0.9	0.9	0.9	0.9
Rv0377_Rv0377	10	2	0.9	0.9	0.9	0.9
Rv2992c_gltS	1	11	0.9	0.9	0.9	0.9
Rv3885c_eccE2	1	2	3	1	1	0.9
Rv0640_rplK	2	2	3	2	0.9	1
Rv2536_Rv2536	2	2	1	0.9	2	1
Rv3280_accD5	3	1	1	0.9	1	3
Rv3137_Rv3137	4	1	1	1	1	1
Rv2818c_Rv2818c	2	4	0.9	2	0.9	3
Rv3274c_fadE25	4	2	2	0.9	0.9	2
Rv3153_nuoI	4	2	2	1	0.9	0.9
Rv1290c_Rv1290c	1	1	4	2	0.9	0.9
Rv0753c_mmsA	0.9	0.9	1	4	1	1
Rv2942_mmpL7	1	0.9	2	1	3	0.9
Rv2475c_Rv2475c	3	1	0.9	2	0.9	1
Rv3101c_ftsX	2	0.9	3	2	1	0.9
Rv2959c_Rv2959c	2	1	6	1	0.9	0.9
Rv1605_hisF	5	3	2	0.9	1	0.9
Rv0400c_fadE7	4	3	1	0.9	1	1
Rv2420c_Rv2420c	2	4	0.9	1	0.9	2
Rv1418_lprH	1	1	4	2	0.9	0.9
Rv2337c_Rv2337c	2	7	1	1	0.9	0.9
Rv0422c_thiD	4	3	2	0.9	0.9	0.9
Rv3229c_desA3	4	2	2	0.9	0.9	0.9
Rv2997_Rv2997	5	4	2	0.9	0.9	0.9
Rv2987c_leuD	4	2	2	0.9	0.9	0.9
Rv0466_Rv0466	4	4	0.9	0.9	1	0.9
Rv0103c_ctpB	4	2	4	0.9	0.9	0.9
Rv2531c_Rv2531c	4	5	1	0.9	0.9	0.9
Rv2724c_fadE20	6	4	0.9	0.9	0.9	1
Rv0817c_Rv0817c	7	2	1	0.9	0.9	0.9
Rv1277_Rv1277	4	5	0.9	0.9	0.9	1
Rv0078A_Rv0078A	5	5	1	0.9	0.9	0.9
Rv3441c_mrsA	6	3	0.9	0.9	1	0.9
Rv0087_hycE	3	5	1	0.9	0.9	0.9
Rv0275c_Rv0275c	4	5	0.9	0.9	0.9	0.9
Rv0486_mshA	5	5	0.9	0.9	0.9	0.9
Rv1108c_xseA	7	4	0.9	0.9	0.9	0.9
Rv1502_Rv1502	5	4	0.9	0.9	0.9	0.9
Rv1977_Rv1977	0.9	5	4	0.9	0.9	0.9
Rv2008c_Rv2008c	5	4	0.9	0.9	0.9	0.9
Rv2867c_Rv2867c	6	5	0.9	0.9	0.9	0.9
Rv3227_aroA	5	4	0.9	0.9	0.9	0.9
Rv3694c_Rv3694c	0.9	0.9	4	6	0.9	0.9
Rv0112_gca	6	4	0.9	0.9	0.9	0.9
Rv2038c_Rv2038c	8	3	0.9	0.9	0.9	0.9
Rv3806c_ubiA	1	1	2	2	2	1
Rv2181_Rv2181	1	1	3	3	2	0.9
Rv3718c_Rv3718c	2	1	3	2	0.9	2
Rv3767c_Rv3767c	3	3	1	0.9	1	1
Rv0654_Rv0654	3	1	3	1	1	0.9
Rv1276c_Rv1276c	1	5	0.9	1	0.9	2
Rv1748_Rv1748	1	1	4	3	0.9	0.9
Rv2676c_Rv2676c	3	4	0.9	0.9	2	1
Rv0185_Rv0185	4	3	1	0.9	1	0.9
Rv3846_sodA	4	3	1	0.9	0.9	1
Rv2165c_Rv2165c	0.9	3	0.9	3	0.9	2
Rv3305c_amiA1	4	0.9	2	1	1	1
Rv2740_ephG	4	2	3	0.9	0.9	0.9
Rv0231_fadE4	3	4	0.9	0.9	0.9	2
Rv3579c_Rv3579c	4	4	0.9	0.9	0.9	2
Rv2064_cobG	4	2	2	0.9	0.9	0.9
Rv1360_Rv1360	0.9	6	0.9	2	0.9	2
Rv3330_dacB1	5	0.9	3	1	0.9	0.9
Rv3228_Rv3228	4	2	0.9	1	0.9	0.9
Rv2139_pyrD	1	2	2	0.9	0.9	0.9
Rv3365c_Rv3365c	3	0.9	1	1	0.9	0.9
Rv0450c_mmpL4	2	3	1	0.9	0.9	0.9
Rv1021_Rv1021	6	3	0.9	0.9	1	0.9
Rv2453c_mobA	4	4	0.9	0.9	1	0.9
Rv2949c_Rv2949c	5	3	0.9	0.9	1	0.9
Rv0503c_cmaA2	4	2	0.9	0.9	0.9	1
Rv3614c_espD	4	5	0.9	0.9	0.9	1
Rv2795c_Rv2795c	3	2	1	1	0.9	0.9
Rv3576_lppH	0.9	0.9	2	4	0.9	0.9
Rv2124c_metH	3	6	0.9	0.9	0.9	0.9
Rv0120c_fusA2	5	3	0.9	0.9	0.9	0.9
Rv2370c_Rv2370c	4	5	0.9	0.9	0.9	0.9
Rv2800_Rv2800	4	4	0.9	0.9	0.9	0.9
Rv2886c_Rv2886c	5	5	0.9	0.9	0.9	0.9
Rv3297_nei	3	4	0.9	0.9	0.9	0.9
Rv3257c_pmmA	4	3	0.9	0.9	0.9	0.9
Rv0857_Rv0857	3	5	0.9	0.9	0.9	0.9
Rv3062_ligB	7	3	0.9	0.9	0.9	0.9
Rv1633_uvrB	5	2	0.9	0.9	0.9	0.9
Rv0910_Rv0910	3	4	0.9	0.9	0.9	0.9
Rv3671c_Rv3671c	3	0.9	4	0.9	0.9	0.9
Rv2349c_plcC	7	3	1	0.9	2	0.9
Rv3569c_hsaD	0.9	8	0.9	0.9	0.9	1
Rv0713_Rv0713	1	1	2	2	0.9	2
Rv0008c_Rv0008c	2	1	2	1	0.9	1
Rv3147_nuoC	1	2	3	1	1	0.9
Rv2361c_Rv2361c	2	1	0.9	2	0.9	2
Rv0899_ompA	2	1	4	2	0.9	0.9
Rv2538c_aroB	2	1	4	2	0.9	0.9
Rv3495c_lprN	2	0.9	3	1	1	0.9
Rv0999_Rv0999	2	1	3	0.9	1	0.9
Rv0047c_Rv0047c	1	3	0.9	3	0.9	2
Rv1141c_echA11	5	1	1	0.9	1	0.9
Rv1841c_Rv1841c	1	1	2	1	0.9	0.9
Rv0637_hadC	2	4	1	0.9	0.9	1
Rv1699_pyrG	1	5	0.9	1	0.9	2
Rv0534c_menA	2	1	3	2	1	0.9
Rv1993c_Rv1993c	2	1	2	1	0.9	0.9
Rv0523c_Rv0523c	3	2	2	1	0.9	0.9
Rv0722_rpmD	0.9	3	1	2	0.9	2
Rv3409c_choD	2	2	1	0.9	0.9	0.9
Rv0332_Rv0332	3	2	3	0.9	0.9	0.9
Rv2935_ppsE	2	3	2	0.9	0.9	0.9
Rv2294_Rv2294	4	3	1	0.9	0.9	0.9
Rv1327c_glgE	3	3	0.9	0.9	0.9	2
Rv2192c_trpD	3	3	1	0.9	0.9	0.9
Rv0957_purH	5	2	0.9	0.9	0.9	1
Rv2090_Rv2090	3	2	1	0.9	0.9	0.9
Rv0670_end	0.9	3	0.9	1	0.9	1
Rv1363c_Rv1363c	1	1	4	0.9	0.9	0.9
Rv0539_Rv0539	3	2	1	0.9	0.9	0.9
Rv2611c_Rv2611c	3	5	0.9	1	0.9	0.9
Rv1315_murA	4	2	0.9	1	0.9	0.9
Rv0610c_Rv0610c	5	2	0.9	1	0.9	0.9
Rv1998c_Rv1998c	4	3	1	0.9	0.9	0.9
Rv2464c_Rv2464c	0.9	2	0.9	0.9	0.9	2
Rv0225_Rv0225	4	5	0.9	0.9	0.9	0.9
Rv0548c_menB	4	5	0.9	0.9	0.9	0.9
Rv1185c_fadD21	4	4	0.9	0.9	0.9	0.9
Rv1463_Rv1463	5	3	0.9	0.9	0.9	0.9
Rv1661_pks7	6	4	0.9	0.9	1	0.9
Rv2109c_prcA	4	4	0.9	0.9	0.9	0.9
Rv2201_asnB	4	4	0.9	0.9	0.9	0.9
Rv2314c_Rv2314c	3	4	0.9	0.9	0.9	0.9
Rv2455c_Rv2455c	4	5	0.9	0.9	0.9	0.9
Rv2832c_ugpC	5	3	0.9	0.9	0.9	0.9
Rv3168_Rv3168	3	4	0.9	0.9	0.9	0.9
Rv3631_Rv3631	3	5	0.9	0.9	0.9	0.9
Rv2303c_Rv2303c	6	3	0.9	0.9	0.9	0.9
Rv0272c_Rv0272c	3	6	0.9	0.9	0.9	0.9
Rv2733c_Rv2733c	4	4	0.9	0.9	0.9	0.9
Rv0409_ackA	4	3	0.9	0.9	0.9	0.9
Rv3373_echA18	4	4	0.9	0.9	0.9	0.9
Rv1869c_Rv1869c	6	3	0.9	0.9	0.9	0.9
Rv1084_Rv1084	6	3	0.9	0.9	0.9	0.9
Rv2900c_fdhF	7	2	0.9	0.9	0.9	0.9
Rv1027c_kdpE	4	2	0.9	0.9	0.9	0.9
Rv0694_lldD1	0.9	1	4	0.9	0.9	0.9
Rv3824c_papA1	3	0.9	0.9	0.9	0.9	0.9
Rv2932_ppsB	12	0.9	1	0.9	0.9	0.9
Rv1687c_Rv1687c	0.9	0.9	0.9	4	0.9	0.9
Rv1076_lipU	0.9	8	0.9	0.9	0.9	0.9
Rv2901c_Rv2901c	2	2	1	1	1	1
Rv0583c_lpqN	2	1	1	1	1	1
Rv1596_nadC	3	2	1	0.9	1	1
Rv1140_Rv1140	1	0.9	2	2	2	1
Rv0537c_Rv0537c	1	1	1	2	2	0.9
Rv1022_lpqU	2	2	2	2	0.9	0.9
Rv3432c_gadB	2	2	1	1	0.9	0.9
Rv0815c_cysA2	0.9	2	1	0.9	1	2
Rv3437_Rv3437	1	1	3	2	0.9	0.9
Rv1957_Rv1957	2	3	0.9	1	0.9	2
Rv2681_Rv2681	1	3	0.9	1	0.9	2
Rv3597c_lsr2	1	3	1	0.9	0.9	1
Rv0406c_Rv0406c	2	1	3	1	0.9	0.9
Rv0129c_fbpC	3	1	1	0.9	0.9	1
Rv3815c_Rv3815c	2	2	2	1	0.9	0.9
Rv0928_pstS3	2	0.9	2	1	1	0.9
Rv1086_Rv1086	1	2	1	0.9	0.9	0.9
Rv2821c_Rv2821c	4	2	2	0.9	0.9	0.9
Rv2216_Rv2216	2	2	2	0.9	0.9	0.9
Rv2539c_aroK	0.9	3	0.9	2	0.9	3
Rv1018c_glmU	2	2	1	0.9	0.9	0.9
Rv0638_secE1	1	2	1	0.9	0.9	0.9
Rv3134c_Rv3134c	1	3	0.9	4	0.9	0.9
Rv3243c_Rv3243c	3	3	1	0.9	0.9	0.9
Rv1193_fadD36	5	2	1	0.9	0.9	0.9
Rv0269c_Rv0269c	0.9	1	0.9	1	0.9	2
Rv0215c_fadE3	5	1	1	0.9	0.9	0.9
Rv0845_Rv0845	0.9	0.9	4	2	1	0.9
Rv3389c_htdY	1	2	0.9	0.9	0.9	2
Rv2058c_rpmB2	0.9	2	0.9	1	0.9	3
Rv1837c_glcB	1	3	0.9	0.9	0.9	2
Rv2593c_ruvA	4	2	0.9	0.9	0.9	1
Rv1400c_lipI	4	2	1	0.9	0.9	0.9
Rv0187_Rv0187	3	4	1	0.9	0.9	0.9
Rv1834_lipZ	1	2	0.9	0.9	0.9	0.9
Rv0945_Rv0945	2	4	0.9	0.9	0.9	0.9
Rv0987_Rv0987	0.9	0.9	2	4	0.9	0.9
Rv0329c_Rv0329c	4	4	0.9	0.9	0.9	0.9
Rv0897c_Rv0897c	4	4	0.9	0.9	0.9	0.9
Rv1754c_Rv1754c	3	3	0.9	0.9	0.9	0.9
Rv2918c_glnD	3	4	0.9	0.9	0.9	0.9
Rv3712_Rv3712	4	4	0.9	0.9	0.9	0.9
Rv2822c_Rv2822c	4	3	0.9	0.9	0.9	0.9
Rv2066_cobI	4	3	0.9	0.9	0.9	0.9
Rv1183_mmpL10	3	0.9	3	0.9	0.9	0.9
Rv3819_Rv3819	5	3	0.9	0.9	0.9	0.9
Rv1883c_Rv1883c	3	4	0.9	0.9	0.9	0.9
Rv2477c_Rv2477c	2	4	0.9	0.9	0.9	0.9
Rv0542c_menE	6	2	0.9	0.9	0.9	0.9
Rv3244c_lpqB	2	0.9	3	0.9	0.9	0.9
Rv1534_Rv1534	3	4	0.9	0.9	0.9	0.9
Rv3052c_nrdI	2	5	0.9	0.9	0.9	0.9
Rv1151c_Rv1151c	4	2	0.9	0.9	0.9	0.9
Rv2735c_Rv2735c	2	3	0.9	0.9	0.9	0.9
Rv2033c_Rv2033c	6	2	0.9	0.9	0.9	0.9
Rv1033c_trcR	4	2	0.9	0.9	0.9	0.9
Rv0208c_Rv0208c	5	2	0.9	0.9	0.9	0.9
Rv2510c_Rv2510c	4	1	0.9	0.9	0.9	0.9
Rv0289_espG3	4	1	0.9	0.9	0.9	0.9
Rv0720_rplR	1	2	1	2	0.9	1
Rv3278c_Rv3278c	1	0.9	1	2	1	1
Rv1231c_Rv1231c	1	1	2	2	1	0.9
Rv2190c_Rv2190c	2	2	2	1	0.9	0.9
Rv3882c_eccE1	2	1	1	2	0.9	0.9
Rv1484_inhA	1	1	2	0.9	0.9	1
Rv1096_Rv1096	3	1	2	1	0.9	0.9
Rv3588c_canB	4	1	0.9	0.9	1	1
Rv2474c_Rv2474c	3	2	1	0.9	1	0.9
Rv0020c_fhaA	0.9	1	2	1	2	0.9
Rv1823_Rv1823	1	0.9	2	3	0.9	1
Rv2506_Rv2506	2	2	0.9	1	0.9	1
Rv1886c_fbpB	1	2	1	0.9	0.9	1
Rv1809_PPE33	2	2	1	0.9	1	0.9
Rv1404_Rv1404	4	1	1	1	0.9	0.9
Rv0212c_nadR	2	3	2	0.9	0.9	0.9
Rv0007_Rv0007	2	1	3	0.9	0.9	0.9
Rv1249c_Rv1249c	1	3	2	0.9	0.9	0.9
Rv3071_Rv3071	2	2	2	0.9	0.9	0.9
Rv0091_mtn	2	2	1	0.9	0.9	0.9
Rv2694c_Rv2694c	1	3	0.9	3	0.9	0.9
Rv1835c_Rv1835c	2	1	3	0.9	0.9	0.9
Rv2908c_Rv2908c	3	3	0.9	0.9	0.9	1
Rv0492c_Rv0492c	2	3	1	0.9	0.9	0.9
Rv1263_amiB2	1	3	1	0.9	0.9	0.9
Rv2070c_cobK	3	3	0.9	0.9	0.9	1
Rv3157_nuoM	0.9	0.9	2	2	1	0.9
Rv3574_kstR	1	4	1	0.9	0.9	0.9
Rv0009_ppiA	0.9	4	0.9	0.9	1	1
Rv0498_Rv0498	1	3	1	0.9	0.9	0.9
Rv2773c_dapB	3	1	1	0.9	0.9	0.9
Rv1201c_dapD	2	2	0.9	0.9	0.9	1
Rv3283_sseA	1	4	0.9	0.9	0.9	1
Rv1660_pks10	3	3	1	0.9	0.9	0.9
Rv3133c_devR	3	2	1	0.9	0.9	0.9
Rv3773c_Rv3773c	3	2	1	0.9	0.9	0.9
Rv3245c_mtrB	0.9	1	3	1	0.9	1
Rv3799c_accD4	1	2	0.9	0.9	0.9	0.9
Rv2017_Rv2017	3	2	0.9	0.9	0.9	0.9
Rv0339c_Rv0339c	4	1	0.9	0.9	0.9	0.9
Rv0905_echA6	4	3	0.9	0.9	0.9	0.9
Rv1765c_Rv1765c	3	4	0.9	0.9	0.9	0.9
Rv2121c_hisG	4	3	0.9	0.9	0.9	0.9
Rv2410c_Rv2410c	4	3	0.9	0.9	0.9	0.9
Rv2924c_fpg	2	3	0.9	0.9	0.9	0.9
Rv1074c_fadA3	0.9	4	0.9	0.9	0.9	2
Rv2788_sirR	4	2	0.9	0.9	0.9	0.9
Rv2915c_Rv2915c	4	2	0.9	0.9	0.9	0.9
Rv3600c_Rv3600c	2	5	0.9	0.9	0.9	0.9
Rv3779_Rv3779	2	0.9	4	0.9	0.9	0.9
Rv2240c_Rv2240c	0.9	0.9	3	3	0.9	0.9
Rv1533_Rv1533	5	2	0.9	0.9	0.9	0.9
Rv1796_mycP5	0.9	0.9	5	2	0.9	0.9
Rv1367c_Rv1367c	4	2	0.9	0.9	0.9	0.9
Rv3119_moaE1	4	2	0.9	0.9	0.9	0.9
Rv0729_xylB	4	2	0.9	0.9	0.9	0.9
Rv3557c_Rv3557c	5	2	0.9	0.9	0.9	0.9
Rv3045_adhC	2	3	0.9	0.9	0.9	0.9
Rv0553_menC	5	2	0.9	0.9	0.9	0.9
Rv2943_Rv2943	4	2	0.9	0.9	0.9	0.9
Rv1196_PPE18	3	2	0.9	0.9	0.9	0.9
Rv1828_Rv1828	5	1	0.9	0.9	0.9	0.9
Rv1879_Rv1879	1	5	0.9	0.9	0.9	0.9
Rv1262c_Rv1262c	4	2	0.9	0.9	0.9	0.9
Rv3598c_lysS	4	1	0.9	0.9	0.9	0.9
Rv1269c_Rv1269c	3	2	0.9	0.9	0.9	0.9
Rv1082_mca	5	1	0.9	0.9	0.9	0.9
Rv3649_Rv3649	1	6	0.9	0.9	0.9	0.9
Rv0363c_fba	0.9	6	0.9	0.9	0.9	0.9
Rv1165_typA	6	0.9	0.9	0.9	0.9	0.9
Rv2264c_Rv2264c	0.9	0.9	4	0.9	0.9	0.9
Rv1312_Rv1312	2	1	2	1	1	0.9
Rv1101c_Rv1101c	1	0.9	2	2	1	0.9
Rv0538_Rv0538	1	1	2	1	0.9	0.9
Rv3499c_mce4A	2	0.9	1	1	1	0.9
Rv1381_pyrC	3	1	1	0.9	1	0.9
Rv1822_pgsA2	2	0.9	2	0.9	1	1
Rv0497_Rv0497	1	1	3	1	0.9	0.9
Rv2732c_Rv2732c	1	0.9	2	3	0.9	0.9
Rv2026c_Rv2026c	2	0.9	3	2	0.9	0.9
Rv3615c_espC	3	1	2	0.9	0.9	0.9
Rv2588c_yajC	2	1	0.9	2	0.9	0.9
Rv0407_fgd1	2	1	2	0.9	0.9	0.9
Rv3136_PPE51	3	2	1	0.9	0.9	0.9
Rv2819c_Rv2819c	4	1	0.9	1	0.9	0.9
Rv3785_Rv3785	1	0.9	1	2	0.9	0.9
Rv0790c_Rv0790c	3	2	1	0.9	0.9	0.9
Rv1520_Rv1520	1	4	0.9	1	0.9	0.9
Rv3287c_rsbW	4	1	1	0.9	0.9	0.9
Rv1142c_echA10	4	0.9	1	1	0.9	0.9
Rv0224c_Rv0224c	2	1	0.9	0.9	0.9	0.9
Rv3886c_mycP2	0.9	0.9	2	1	1	0.9
Rv3120_Rv3120	3	2	0.9	0.9	1	0.9
Rv1383_carA	3	2	0.9	1	0.9	0.9
Rv0513_Rv0513	1	0.9	4	1	0.9	0.9
Rv2125_Rv2125	1	2	1	1	1	0.9
Rv3081_Rv3081	2	2	1	0.9	0.9	0.9
Rv1507c_Rv1507c	1	4	0.9	1	0.9	0.9
Rv1362c_Rv1362c	0.9	2	2	0.9	0.9	0.9
Rv1830_Rv1830	2	2	0.9	0.9	0.9	0.9
Rv0888_Rv0888	3	3	0.9	0.9	0.9	0.9
Rv2841c_nusA	3	3	0.9	0.9	0.9	0.9
Rv3171c_hpx	2	2	0.9	0.9	0.9	0.9
Rv0251c_hsp	2	3	0.9	0.9	0.9	0.9
Rv0773c_ggtA	4	2	0.9	0.9	0.9	0.9
Rv2362c_recO	3	3	0.9	0.9	0.9	0.9
Rv1332_Rv1332	3	2	0.9	0.9	0.9	0.9
Rv0411c_glnH	0.9	0.9	5	2	0.9	0.9
Rv1844c_gnd1	4	2	0.9	0.9	0.9	0.9
Rv1496_Rv1496	2	2	0.9	0.9	0.9	0.9
Rv0146_Rv0146	5	3	1	0.9	1	1
Rv1132_Rv1132	0.9	0.9	3	2	0.9	0.9
Rv2231c_cobC	4	2	0.9	0.9	0.9	0.9
Rv1665_pks11	1	3	0.9	0.9	0.9	0.9
Rv2946c_pks1	3	1	1	0.9	0.9	0.9
Rv2119_Rv2119	4	1	0.9	0.9	0.9	0.9
Rv3708c_asd	1	3	0.9	0.9	0.9	0.9
Rv0079_Rv0079	0.9	1	0.9	3	0.9	0.9
Rv0154c_fadE2	1	2	0.9	0.9	0.9	0.9
Rv0361_Rv0361	0.9	0.9	3	1	0.9	0.9
Rv0115_hddA	3	1	0.9	0.9	0.9	0.9
Rv0271c_fadE6	3	1	0.9	0.9	0.9	0.9
Rv2084_Rv2084	4	1	0.9	0.9	0.9	0.9
Rv3792_aftA	0.9	0.9	2	1	0.9	0.9
Rv0490_senX3	4	0.9	1	0.9	0.9	0.9
Rv1472_echA12	5	1	0.9	0.9	0.9	0.9
Rv0050a_PonA1truncated	0.9	0.9	4	1	0.9	0.9
Rv1384_carB	5	0.9	0.9	0.9	0.9	0.9
Rv1072_Rv1072	1	1	2	0.9	1	0.9
Rv2412_rpsT	1	2	0.9	1	0.9	1
Rv2441c_rpmA	1	1	0.9	1	0.9	2
Rv2991_Rv2991	1	2	0.9	1	0.9	1
Rv1808_PPE32	1	2	0.9	1	1	0.9
Rv2166c_Rv2166c	1	1	0.9	1	0.9	2
Rv1283c_oppB	1	0.9	2	1	0.9	0.9
Rv0002_dnaN	2	2	0.9	0.9	0.9	1
Rv2072c_cobL	2	2	1	0.9	0.9	0.9
Rv2055c_rpsR2	0.9	2	0.9	1	0.9	2
Rv1591_Rv1591	1	0.9	2	1	0.9	0.9
Rv2037c_Rv2037c	2	1	1	0.9	0.9	0.9
Rv3224_Rv3224	1	2	0.9	0.9	0.9	2
Rv3887c_eccD2	0.9	0.9	1	2	1	0.9
Rv0690c_Rv0690c	1	1	2	0.9	0.9	0.9
Rv2574_Rv2574	1	2	1	0.9	0.9	0.9
Rv2702_ppgK	1	3	0.9	1	0.9	0.9
Rv0563_htpX	0.9	0.9	2	1	1	0.9
Rv2566_Rv2566	3	1	0.9	0.9	1	0.9
Rv1424c_Rv1424c	0.9	0.9	2	1	1	0.9
Rv3210c_Rv3210c	2	2	0.9	0.9	0.9	0.9
Rv2360c_Rv2360c	2	2	0.9	0.9	0.9	0.9
Rv2236c_cobD	2	3	0.9	0.9	0.9	0.9
Rv3690_Rv3690	0.9	0.9	2	2	0.9	0.9
Rv1062_Rv1062	3	2	0.9	0.9	0.9	0.9
Rv3029c_fixA	0.9	2	0.9	0.9	0.9	2
Rv1685c_Rv1685c	2	2	0.9	0.9	0.9	0.9
Rv2552c_aroE	3	2	0.9	0.9	0.9	0.9
Rv3713_cobQ2	2	3	0.9	0.9	0.9	0.9
Rv3094c_Rv3094c	3	2	0.9	0.9	0.9	0.9
Rv1746_pknF	0.9	0.9	3	2	0.9	0.9
Rv1109c_Rv1109c	3	2	0.9	0.9	0.9	0.9
Rv3672c_Rv3672c	2	2	0.9	0.9	0.9	0.9
Rv2004c_Rv2004c	2	2	0.9	0.9	0.9	0.9
Rv1625c_cya	0.9	0.9	2	2	0.9	0.9
Rv1649_pheS	3	2	0.9	0.9	0.9	0.9
Rv2525c_Rv2525c	2	3	0.9	0.9	0.9	0.9
Rv1448c_tal	0.9	1	0.9	0.9	0.9	3
Rv1887_Rv1887	3	1	0.9	0.9	0.9	0.9
Rv0792c_Rv0792c	1	2	0.9	0.9	0.9	0.9
Rv0565c_Rv0565c	1	2	3	0.9	0.9	0.9
Rv0167_yrbE1A	2	0.9	2	0.9	0.9	0.9
Rv3255c_manA	2	0.9	1	0.9	0.9	0.9
Rv2134c_Rv2134c	1	3	0.9	0.9	0.9	0.9
Rv0525_Rv0525	2	0.9	1	0.9	0.9	0.9
Rv2637_dedA	2	0.9	0.9	0.9	1	0.9
Rv3537_kstD	0.9	2	1	0.9	0.9	0.9
Rv3589_mutY	2	2	0.9	0.9	0.9	0.9
Rv3923c_rnpA	2	3	0.9	0.9	0.9	0.9
Rv1148c_Rv1148c	4	1	0.9	0.9	0.9	0.9
Rv0179c_lprO	3	1	0.9	0.9	0.9	0.9
Rv1259_udgB	0.9	2	0.9	0.9	0.9	2
Rv1626_Rv1626	3	2	0.9	0.9	0.9	0.9
Rv3359_Rv3359	1	2	0.9	0.9	0.9	0.9
Rv0408_pta	4	1	0.9	0.9	0.9	0.9
Rv1474c_Rv1474c	0.9	2	1	0.9	0.9	1
Rv2218_lipA	1	3	0.9	0.9	0.9	0.9
Rv2905_lppW	4	1	0.9	0.9	0.9	0.9
Rv3199c_nudC	4	1	0.9	0.9	0.9	0.9
Rv0233_nrdB	2	1	0.9	0.9	0.9	0.9
Rv2848c_cobB	2	1	0.9	0.9	0.9	0.9
Rv2629_Rv2629	1	2	0.9	0.9	0.9	0.9
Rv0429c_def	4	1	0.9	0.9	0.9	0.9
Rv2393_che1	3	1	0.9	0.9	0.9	0.9
Rv1324_Rv1324	2	1	0.9	0.9	0.9	0.9
Rv1121_zwf1	3	1	0.9	0.9	0.9	0.9
Rv0803_purL	4	1	0.9	0.9	0.9	0.9
Rv2380c_mbtE	0.9	0.9	0.9	1	0.9	2
Rv1729c_Rv1729c	3	0.9	0.9	0.9	0.9	0.9
Rv0211_pckA	0.9	4	0.9	0.9	0.9	0.9
Rv1208_gpgS	5	0.9	0.9	0.9	0.9	0.9
Rv3161c_Rv3161c	4	0.9	0.9	0.9	0.9	0.9
Rv1900c_lipJ	3	0.9	0.9	0.9	0.9	0.9
Rv0066c_icd2	1	2	0.9	0.9	0.9	1
Rv0431_Rv0431	1	0.9	2	1	0.9	0.9
Rv2188c_pimB	1	1	2	0.9	0.9	0.9
Rv2383c_mbtB	2	1	1	0.9	0.9	0.9
Rv3464_rmlB	2	1	0.9	0.9	0.9	1
Rv0281_Rv0281	1	2	1	0.9	0.9	0.9
Rv1346_mbtN	2	1	1	0.9	0.9	0.9
Rv3298c_lpqC	1	0.9	2	1	0.9	0.9
Rv2698_Rv2698	1	1	2	0.9	0.9	0.9
Rv1612_trpB	1	1	2	0.9	0.9	0.9
Rv1654_argB	2	1	0.9	1	0.9	0.9
Rv1144_Rv1144	2	2	0.9	0.9	0.9	0.9
Rv3731_ligC	2	2	0.9	0.9	0.9	0.9
Rv0814c_sseC2	2	2	0.9	0.9	0.9	0.9
Rv3410c_guaB3	2	2	0.9	0.9	0.9	0.9
Rv1694_tlyA	2	2	0.9	0.9	0.9	0.9
Rv2249c_glpD1	2	2	0.9	0.9	0.9	0.9
Rv2554c_Rv2554c	2	2	0.9	0.9	0.9	0.9
Rv1668c_Rv1668c	2	2	0.9	0.9	0.9	0.9
Rv0458_Rv0458	2	2	0.9	0.9	0.9	0.9
Rv0135c_Rv0135c	2	2	0.9	0.9	0.9	0.9
Rv1316c_ogt	2	2	0.9	0.9	0.9	0.9
Rv1647_Rv1647	2	1	0.9	0.9	0.9	0.9
Rv0920c_Rv0920c	1	2	0.9	0.9	0.9	0.9
Rv2140c_TB18.6	0.9	2	0.9	0.9	0.9	2
Rv2112c_dop	1	2	0.9	0.9	0.9	0.9
Rv3095_Rv3095	2	2	0.9	0.9	0.9	0.9
Rv2725c_hflX	1	3	0.9	0.9	0.9	0.9
Rv3060c_Rv3060c	1	3	0.9	0.9	0.9	0.9
Rv3306c_amiB1	1	3	0.9	0.9	0.9	0.9
Rv1843c_guaB1	1	4	0.9	0.9	0.9	0.9
Rv3198A_Rv3198A	2	2	0.9	0.9	0.9	0.9
Rv1675c_cmr	2	2	0.9	0.9	0.9	0.9
Rv1373_Rv1373	3	1	0.9	0.9	0.9	0.9
Rv1864c_Rv1864c	3	1	0.9	0.9	0.9	0.9
Rv2067c_Rv2067c	3	1	0.9	0.9	0.9	0.9
Rv2502c_accD1	3	1	0.9	0.9	0.9	0.9
Rv0052_Rv0052	3	1	0.9	0.9	0.9	0.9
Rv3419c_gcp	3	1	0.9	0.9	0.9	0.9
Rv2633c_Rv2633c	3	1	0.9	0.9	0.9	0.9
Rv2259_mscR	2	1	0.9	0.9	0.9	0.9
Rv3030_Rv3030	3	1	0.9	0.9	0.9	0.9
Rv0090_Rv0090	0.9	1	2	0.9	0.9	0.9
Rv2157c_murF	2	1	0.9	0.9	0.9	0.9
Rv2862c_Rv2862c	1	3	0.9	0.9	0.9	0.9
Rv0953c_Rv0953c	0.9	3	0.9	0.9	0.9	1
Rv1007c_metS	3	1	0.9	0.9	0.9	0.9
Rv3422c_Rv3422c	1	3	0.9	0.9	0.9	0.9
Rv0870c_Rv0870c	0.9	0.9	2	1	0.9	0.9
Rv1048c_Rv1048c	0.9	2	0.9	0.9	0.9	0.9
Rv3553_Rv3553	0.9	2	0.9	1	0.9	0.9
Rv0443_Rv0443	1	3	0.9	0.9	0.9	0.9
Rv2411c_Rv2411c	4	0.9	0.9	0.9	0.9	1
Rv1127c_ppdK	4	0.9	0.9	0.9	0.9	0.9
Rv3651_Rv3651	3	0.9	0.9	0.9	0.9	0.9
Rv3762c_Rv3762c	5	0.9	0.9	0.9	0.9	0.9
Rv2000_Rv2000	3	0.9	0.9	0.9	0.9	0.9
Rv0908_ctpE	0.9	0.9	3	0.9	0.9	0.9
Rv1895_Rv1895	2	0.9	0.9	0.9	0.9	0.9
Rv0423c_thiC	3	0.9	0.9	0.9	0.9	0.9
Rv3730c_Rv3730c	0.9	3	0.9	0.9	0.9	0.9
Rv1069c_Rv1069c	0.9	0.9	2	0.9	1	0.9
Rv2473_Rv2473	0.9	0.9	2	0.9	1	0.9
Rv0379_secE2	1	2	0.9	0.9	0.9	0.9
Rv1340_rphA	1	2	0.9	0.9	0.9	0.9
Rv2036_Rv2036	1	2	0.9	0.9	0.9	0.9
Rv2035_Rv2035	1	2	0.9	0.9	0.9	0.9
Rv0487_Rv0487	1	2	0.9	0.9	0.9	0.9
Rv0465c_Rv0465c	1	2	0.9	0.9	0.9	0.9
Rv0353_hspR	2	1	0.9	0.9	0.9	0.9
Rv1462_Rv1462	2	1	0.9	0.9	0.9	0.9
Rv2222c_glnA2	2	1	0.9	0.9	0.9	0.9
Rv2558_Rv2558	2	1	0.9	0.9	0.9	0.9
Rv2870c_dxr	2	1	0.9	0.9	0.9	0.9
Rv3040c_Rv3040c	2	1	0.9	0.9	0.9	0.9
Rv3404c_Rv3404c	2	1	0.9	0.9	0.9	0.9
Rv3016_lpqA	0.9	0.9	1	2	0.9	0.9
Rv2497c_bkdA	2	1	0.9	0.9	0.9	0.9
Rv1608c_bcpB	2	1	0.9	0.9	0.9	0.9
Rv2202c_adoK	3	2	0.9	0.9	0.9	0.9
Rv0904c_accD3	2	1	0.9	0.9	0.9	0.9
Rv3568c_hsaC	0.9	3	0.9	1	0.9	0.9
Rv2597_Rv2597	2	0.9	1	0.9	0.9	0.9
Rv1028c_kdpD	1	2	0.9	0.9	0.9	0.9
Rv0606_Rv0606	2	1	0.9	0.9	0.9	0.9
Rv2861c_mapB	2	1	0.9	0.9	0.9	0.9
Rv3864_espE	2	0.9	1	0.9	0.9	0.9
Rv3780_Rv3780	1	2	0.9	0.9	0.9	0.9
Rv0473_Rv0473	2	0.9	1	0.9	0.9	0.9
Rv2696c_Rv2696c	2	1	0.9	0.9	0.9	0.9
Rv0985c_mscL	0.9	0.9	2	1	0.9	0.9
Rv3035_Rv3035	0.9	0.9	2	1	0.9	0.9
Rv0877_Rv0877	2	1	0.9	0.9	0.9	0.9
Rv3414c_sigD	1	0.9	2	0.9	0.9	0.9
Rv0951_sucC	1	2	0.9	0.9	0.9	0.9
Rv1698_mctB	1	0.9	2	0.9	0.9	0.9
Rv2899c_fdhD	2	1	0.9	0.9	0.9	0.9
Rv2658c_Rv2658c	2	1	0.9	0.9	0.9	0.9
Rv2032_acg	0.9	2	0.9	0.9	0.9	1
Rv0175_Rv0175	2	1	0.9	0.9	0.9	0.9
Rv1453_Rv1453	2	1	0.9	0.9	0.9	0.9
Rv2688c_Rv2688c	2	1	0.9	0.9	0.9	0.9
Rv2130c_mshC	1	2	0.9	0.9	0.9	0.9
Rv1056_Rv1056	2	1	0.9	0.9	0.9	0.9
Rv1932_tpx	0.9	2	0.9	0.9	0.9	1
Rv3764c_tcrY	0.9	0.9	2	0.9	0.9	0.9
Rv1956_higA	0.9	2	0.9	0.9	0.9	0.9
Rv1257c_Rv1257c	2	0.9	0.9	0.9	0.9	0.9
Rv2003c_Rv2003c	0.9	2	0.9	0.9	0.9	0.9
Rv0389_purT	0.9	0.9	3	0.9	0.9	0.9
Rv3736_Rv3736	0.9	3	0.9	0.9	0.9	0.9
Rv2555c_alaS	3	0.9	0.9	0.9	0.9	0.9
Rv2185c_TB16.3	3	0.9	0.9	0.9	0.9	0.9
Rv0663_atsD	3	0.9	0.9	0.9	0.9	0.9
Rv0989c_grcC2	3	0.9	0.9	0.9	0.9	0.9
Rv2630_Rv2630	0.9	0.9	0.9	3	0.9	0.9
Rv3179_Rv3179	2	0.9	0.9	0.9	0.9	0.9
Rv2710_sigB	2	5	1	1	1	1
Rv0468_fadB2	0.9	2	0.9	0.9	0.9	0.9
Rv2079_Rv2079	0.9	0.9	2	0.9	0.9	0.9
Rv1501_Rv1501	2	0.9	0.9	0.9	0.9	0.9
Rv2336_Rv2336	3	0.9	0.9	0.9	0.9	0.9
Rv2427c_proA	3	0.9	0.9	0.9	0.9	0.9
Rv3174_Rv3174	3	0.9	0.9	0.9	0.9	0.9
Rv1260_Rv1260	2	0.9	0.9	0.9	0.9	0.9
Rv0080_Rv0080	0.9	4	0.9	0.9	0.9	0.9
Rv0049_Rv0049	0.9	2	0.9	0.9	0.9	0.9
Rv0735_sigL	0.9	0.9	2	0.9	0.9	0.9
Rv2701c_suhB	0.9	0.9	2	0.9	0.9	0.9
Rv3856c_Rv3856c	0.9	2	0.9	0.9	0.9	0.9
Rv1026_Rv1026	2	0.9	0.9	0.9	0.9	0.9
Rv1470_trxA	2	0.9	0.9	0.9	0.9	0.9
Rv1207_folP2	2	0.9	0.9	0.9	0.9	0.9
Rv3502c_Rv3502c	2	0.9	0.9	0.9	0.9	0.9
Rv0421c_Rv0421c	0.9	2	0.9	0.9	0.9	0.9
Rv2137c_Rv2137c	2	0.9	0.9	0.9	0.9	0.9
Rv1001_arcA	2	0.9	0.9	0.9	0.9	0.9
Rv1182_papA3	3	0.9	0.9	0.9	0.9	0.9
Rv2625c_Rv2625c	0.9	0.9	0.9	2	0.9	0.9
Rv0405_pks6	2	0.9	0.9	0.9	0.9	0.9
Rv3687c_rsfB	2	0.9	0.9	0.9	0.9	0.9
Rv2080_lppJ	0.9	0.9	2	0.9	0.9	0.9
Rv1348_irtA	0.9	0.9	2	0.9	0.9	0.9
Rv0158_Rv0158	2	0.9	0.9	0.9	0.9	0.9
Rv1449c_tkt	0.9	2	0.9	0.9	0.9	0.9
Rv2958c_Rv2958c	3	0.9	0.9	1	2	1
Rv0844c_narL	2	0.9	0.9	0.9	0.9	0.9
Rv3594_Rv3594	2	0.9	0.9	0.9	0.9	0.9
Rv1825_Rv1825	0.9	0.9	3	0.9	0.9	0.9
Rv3238c_Rv3238c	0.9	0.9	0.9	2	0.9	0.9
Rv2837c_Rv2837c	2	0.9	0.9	0.9	0.9	0.9
Rv0672_fadE8	2	0.9	0.9	0.9	0.9	0.9
Rv3368c_Rv3368c	0.9	2	0.9	0.9	0.9	0.9
Rv2938_drrC	0.9	0.9	2	0.9	0.9	0.9
Rv3468c_Rv3468c	2	0.9	0.9	0.9	0.9	0.9
Rv0051_Rv0051	0.9	0.9	2	0.9	0.9	0.9
Rv2999_lppY	0.9	0.9	2	0.9	0.9	0.9
Rv1459c_Rv1459c	0.9	0.9	0.9	2	0.9	0.9
